# Supplementary material for: Active nematics with deformable particles
Source: Royal Society of Chemistry journal article supplement (doi:10.1039/d3sm00627a), 2023-01-01
Supplement: d3sm00627a2.pdf [file d3sm00627a2.pdf]

## Electronic Supplementary Material

July 21, 2023

### 1 Movie Caption

Active turbulence with deformable particles. Activity parameter is set to  $\zeta = 0.0007$ . (a) Aspect ratio,  $\omega$  of particles. Colour scale indicates its magnitude. (b) Nematic director field  $\mathbf{n}$  and scalar order parameter  $S$ . Colour scale indicates the magnitude of  $S$ . Red/blue symbols correspond to the core of  $\pm 1/2$  defects respectively.  $+1/2$  defects are oriented such that the tail is along the line shown. (c) Velocity field,  $\mathbf{u}$ . Colour scale indicates the magnitude of the velocity. (d) Projection of the strain rate along the director field,  $E_{\parallel} = n_i E_{ij} n_j$ . Colour scale indicates its sign and magnitude.

### 2 Dispersion Relation Derivation

The inverse Fourier transform for a fluctuating field  $f'$  is given by

$$f'(\mathbf{r}, t) = \int d\lambda dq \tilde{f}(\mathbf{q}, \lambda) e^{i\mathbf{q}\cdot\mathbf{r} + \lambda t}. \quad (1)$$

The time evolution equation for the tensorial order parameter  $\mathbf{Q}$  is eliminated by setting  $\mathbf{n} = \hat{x}$  and  $S = (\omega - 1)/\omega$ . The relevant equations of motion to first order in the perturbed fields are then:

$$\partial_t \omega' = 2E'_{\parallel} - \Gamma_{\omega} A_{\omega} \omega' + \frac{3}{2} \Gamma_{\omega} K_{LC} \nabla^2 \omega', \quad (2)$$

$$\rho \partial_t u'_i = \partial_j \left( 2\eta E'_{ij} - p' \delta_{ij} - \frac{3}{2} \zeta \omega' (n_i n_j - \frac{1}{3} \delta_{ij}) \right). \quad (3)$$

In Fourier space, incompressibility reads

$$q_j \tilde{u}_j = 0 \Rightarrow \tilde{u}_x = -\frac{\sin \theta}{\cos \theta} \tilde{u}_y. \quad (4)$$

In Fourier space, Eq. (3) reads:

$$\rho \lambda \tilde{u}_i = \eta \left( -q_i \underbrace{q_j \tilde{u}_j}_{=0} - q^2 \tilde{u}_i \right) - q_i \tilde{p} - \frac{3i}{2} \zeta \tilde{\omega} q_j \left( n_i n_j - \frac{1}{3} \delta_{ij} \right). \quad (5)$$

Taking  $\mathbf{n} = (1, 0, 0)$  and  $\mathbf{q} = q(\cos \theta, \sin \theta, 0)$  where  $\theta$  is the angle between  $\mathbf{n}$  and  $\mathbf{q}$  and considering  $i = x$ , we get

$$\rho \lambda \tilde{u}_x = -\eta q^2 \tilde{u}_x - iq \cos \theta \tilde{p} - i \zeta \tilde{\omega} q \cos \theta, \quad (6)$$

from which we can solve for  $\tilde{p}$

$$\tilde{p} = \frac{i}{q \cos \theta} (\rho\lambda + \eta q^2) \tilde{u}_x - \zeta \tilde{\omega} = -\zeta \tilde{\omega} - \frac{i \sin \theta}{q \cos^2 \theta} (\rho\lambda + \eta q^2) \tilde{u}_y, \quad (7)$$

where we have used incompressibility (4) in the final step. Now consider  $i = y$

$$\rho\lambda \tilde{u}_y = -\eta q^2 \tilde{u}_y - iq \sin \theta \tilde{p} - \frac{3i}{2} \zeta \tilde{\omega} \left( -\frac{1}{3} q \sin \theta \right). \quad (8)$$

Substituting the expression (7) for  $\tilde{p}$

$$(\rho\lambda + \eta q^2) \tilde{u}_y = -\frac{\sin^2 \theta}{\cos^2 \theta} (\rho\lambda + \eta q^2) \tilde{u}_y + iq \sin \theta \zeta \tilde{\omega} + \frac{i}{2} q \sin \theta \zeta \tilde{\omega}, \quad (9)$$

allows us to solve for  $\tilde{u}_y$

$$\tilde{u}_y = \frac{3iq \cos^2 \theta \sin \theta \zeta \tilde{\omega}}{2(\rho\lambda + \eta q^2)}. \quad (10)$$

Next, we consider Eq. (2) in Fourier space:

$$\lambda \tilde{\omega} = 2iq \cos \theta \tilde{u}_x - \Gamma_\omega A_\omega \tilde{\omega} - \frac{3}{2} \Gamma_\omega K_{LC} q^2 \tilde{\omega}. \quad (11)$$

Substituting for  $\tilde{u}_x$  by using (10) for  $\tilde{u}_y$  and the incompressibility relation (4), we finally get

$$\lambda \tilde{\omega} = \frac{3q^2 \cos^2 \theta \sin^2 \theta \zeta}{(\rho\lambda + \eta q^2)} \tilde{\omega} - \Gamma_\omega A_\omega \tilde{\omega} - \frac{3}{2} \Gamma_\omega K_{LC} q^2 \tilde{\omega}, \quad (12)$$

which, after some algebraic manipulation and a double angle formula gives the dispersion relation

$$q^2 \left( \left( \eta + \frac{3}{2} \Gamma_\omega K_{LC} \rho \right) \lambda + \Gamma_\omega A_\omega \eta - \frac{3}{4} \zeta \sin^2 2\theta \right) + \frac{3}{2} \Gamma_\omega K_{LC} \eta q^4 + \rho \lambda^2 + \Gamma_\omega A_\omega \rho \lambda = 0. \quad (13)$$

For a solution with  $\lambda > 0$  to exist for some value of  $q$ , we require the coefficient of  $q^2$  to be negative. There is then a critical value of the activity, below which an isotropic system will be stable, given by

$$\zeta_c = \frac{4\Gamma_\omega A_\omega \eta}{3 \sin^2 2\theta}. \quad (14)$$

$\zeta_c$  is clearly minimised when  $\theta = \pi/4$ . An analytical expression may be obtained for the most unstable wave vector,  $q_m$  which corresponds to the local maximum of the growth rate,  $\lambda_m$ . This is given by:

$$q_m^2 = \frac{\sqrt{2\rho K_{LC} \Gamma_\omega \zeta \sin^2 2\theta J_+^2 R - 4\rho K_{LC} \Gamma_\omega \eta T}}{2K_{LC} \Gamma_\omega \eta J_-^2}, \quad (15)$$

$$J_\pm = 2\eta \pm 3\rho \Gamma_\omega K_{LC}, \quad (16)$$

$$R = 3\zeta \sin^2 2\theta - 4\Gamma_\omega A_\omega \eta + 6\rho A_\omega K_{LC} \Gamma_\omega^2, \quad (17)$$

$$T = 3\zeta \sin^2 2\theta - \Gamma_\omega A_\omega J_-. \quad (18)$$

Despite the complicated form of the above expression, the competition between activity versus elasticity and energy is shown to be a determining factor for the most unstable modes. Finally, by setting  $\omega' = \epsilon \sin \mathbf{q} \cdot \mathbf{r}$  and using the Fourier transform of the sin function, we may also find a solution of the flow field,  $\tilde{u}_y$ .

$$\tilde{u}_y = \frac{3iq \cos^2 \theta \sin \theta \zeta}{2(\rho\lambda + \eta q^2)} \frac{1}{2i} (2\pi)^2 \epsilon (\delta(\mathbf{q} + \mathbf{q}') - \delta(\mathbf{q} - \mathbf{q}')). \quad (19)$$

Setting  $\lambda = 0$  for simplicity,  $\theta = \pi/4$ , and inverting the Fourier transform, we may get the full flow field:

$$u_y = -\frac{3}{4\sqrt{2}} \frac{\zeta \epsilon}{\eta q} \cos\left(\frac{1}{\sqrt{2}}(x+y)\right), \quad (20)$$

$$u_x = \frac{3}{4\sqrt{2}} \frac{\zeta \epsilon}{\eta q} \cos\left(\frac{1}{\sqrt{2}}(x+y)\right). \quad (21)$$
